# Supplementary material
Source: Springer Nature journal article supplement (https://www.springermedizin.de/resource/supplementary/12876_2003_62_MOESM9_ESM.pdf/9438614)

p8

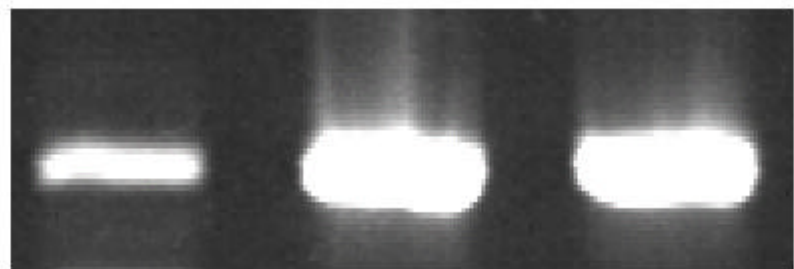

HMG1

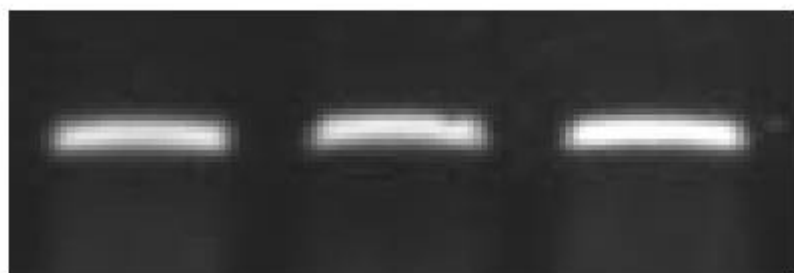

RL3

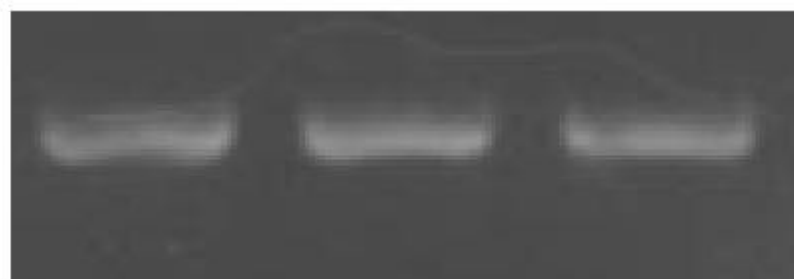

control

6 hours

18 hours

Supplement: MOESM9 [file 9438614]
